# Supplementary material
Source: PubMed Central journal article supplement (PMC3083178)
Supplement: supp_M110.185181_jbc.M110.185181-1.pdf [file supp_M110.185181_jbc.M110.185181-1.pdf]

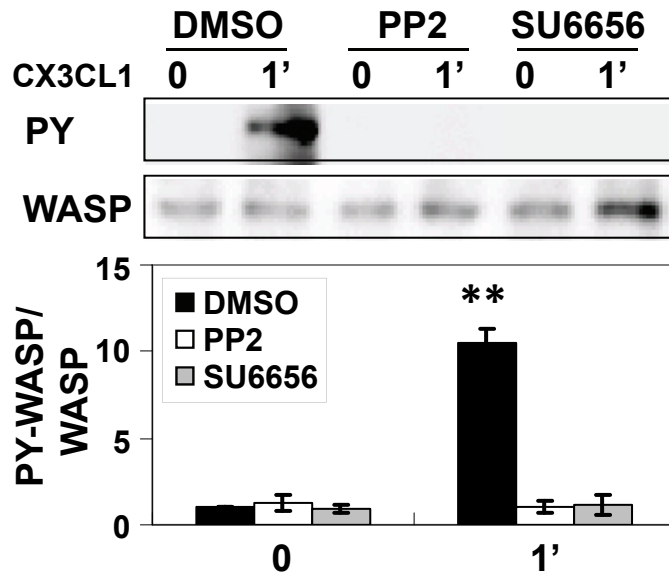

Suppl. Fig. 1. Src family kinases (SFks) regulate WASP tyrosine phosphorylation in BMMs. BMMs pre-treated with either DMSO, 10  $\mu$ M PP2 or 10  $\mu$ M SU6656 were stimulated with CX3CL1 for 1 min. WASP was immunoprecipitated (IP) using WASP antibody following by western blotting for phospho-tyrosine (PY) and WASP. Blots were quantified by densitometry and normalized to amount of WASP. A representative blot and quantification of WASP tyrosine phosphorylation relative to DMSO-treated cells at time 0 are shown;  $n=3$ ,  $\pm$  SEM. \*\*:  $p < 0.01$  compared to DMSO-treated cells at time 0.
