# Supplementary material
Source: PubMed Central journal article supplement (PMC3083178)
Supplement: supp_M110.185181_jbc.M110.185181-2.pdf [file supp_M110.185181_jbc.M110.185181-2.pdf]

**A**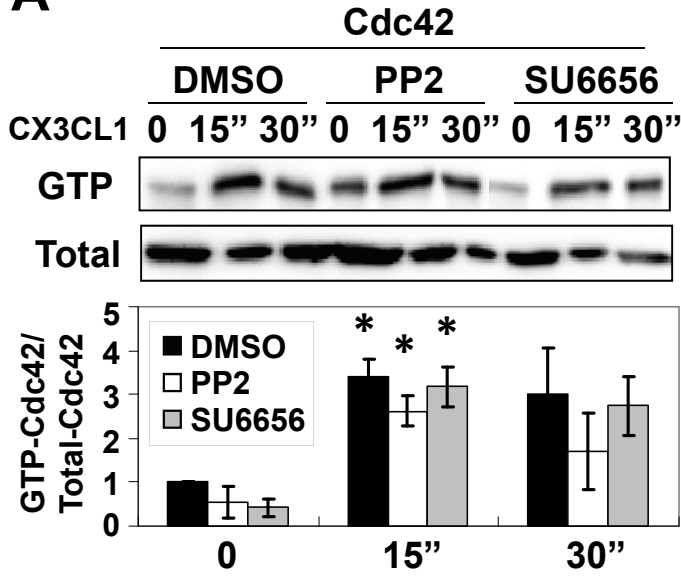**B**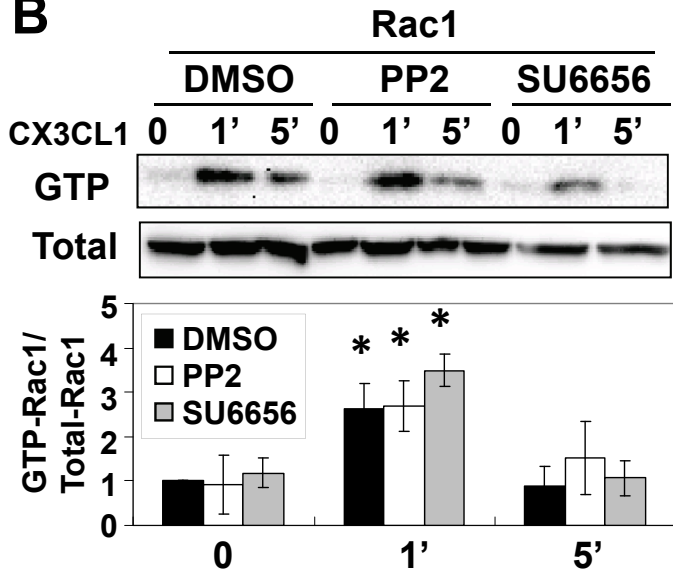**C**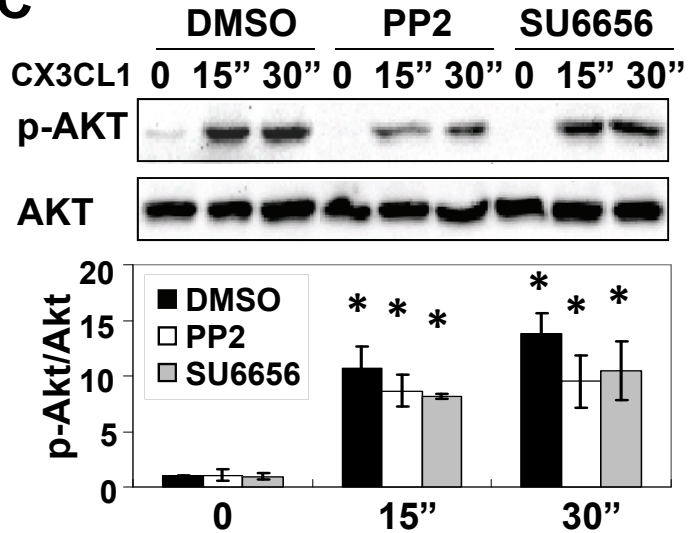

Suppl. Fig. 2. SFKs are not required for the activation of Cdc42, Rac1 and Akt in BMMs. BMMs pre-treated with either DMSO, 10  $\mu$ M PP2 or 10  $\mu$ M SU6656 were stimulated with CX3CL1 for the indicated times, and Cdc42 (A) or Rac1 (B) activity was determined by the amount of PBD bound Cdc42 or Rac1 (GTP) normalized to total Cdc42 or Rac1 in whole cell lysates (Total). A representative blot and quantification of Cdc42 or Rac1 activity relative to DMSO-treated BMMs at time 0 are shown;  $n=3$ ,  $\pm$  SEM. \*:  $p < 0.05$  compared to DMSO-treated BMMs at time 0. (C) BMMs pre-treated with either DMSO, 10  $\mu$ M PP2 or 10  $\mu$ M SU6656 were stimulated with CX3CL1 for the indicated times, and the activation status of Akt was assessed using phospho-specific Akt Ab. The corresponding total levels of Akt expression are shown below. Blots were quantified by densitometry and normalized to amount of Akt. A representative blot and quantification of Akt activity relative to DMSO-treated cells at time 0 are shown;  $n=3$ ,  $\pm$  SEM. \*:  $p < 0.05$  compared to DMSO-treated cells at time 0.
